# Supplementary material
Source: publisher figshare collection journal article supplement (https://tandf.figshare.com/ndownloader/files/18109718)
Supplement: Supplementary file 1 [file 18109718]

**Title: 5Azacytidine incorporated Polycaprolactone - Gelatin nanoscaffold for cardiomyocyte differentiation**

Kerena Rachel, Surajit Pathak, A. Moorthi, Srinivasan Narasimhan, RamachandranMurugesan and Shoba Narayan*

|  | PCL-Gelatin (Figure 5a) | PCL-Gelatin-Aza1  (Figure 5b) | PCL-Gelatin- Aza2  (Figure 5c) | Assignments |
| --- | --- | --- | --- | --- |
| Wavenumber cm-1 | 2935 | 2935 | 2935 | asymmetric (CH2 stretching), |
| Wavenumber cm-1 | 2866 | 2853 | 2853 | symmetric CH2  stretching |
| Wavenumber cm-1 | 1718 | 1713 | 1713 | carbonyl stretching |
| Wavenumber cm-1 | 1280 | 1230 | 1230 | asymmetric C–O–C stretching |
| Wavenumber cm-1 | 1098 | 1104 | 1104 | symmetric C-O-C stretching |
| Wavenumber cm-1 | 1468 | 1462 | 1462 | N–H bending  (amide II) |

*Faculty of Allied Health Sciences, Chettinad Hospital and Research Institute, Chettinad Academy of Research and Education, Kelambakkam, Tamilnadu, 603103, India*

Table S1: Vibrational band assignments of Scaffolds PCL-Gelatin (a), PCL-Gelatin-Aza1 (b), PCL-Gelatin-Aza2 (c)

**
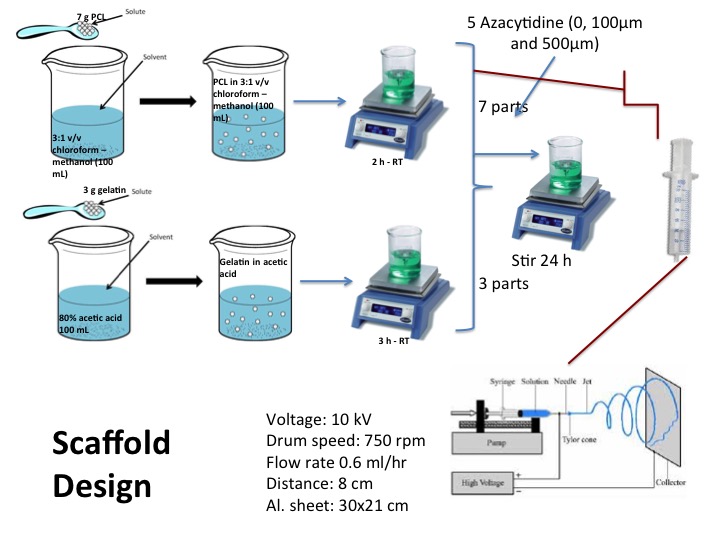
**

Scheme 1 : Scaffold design


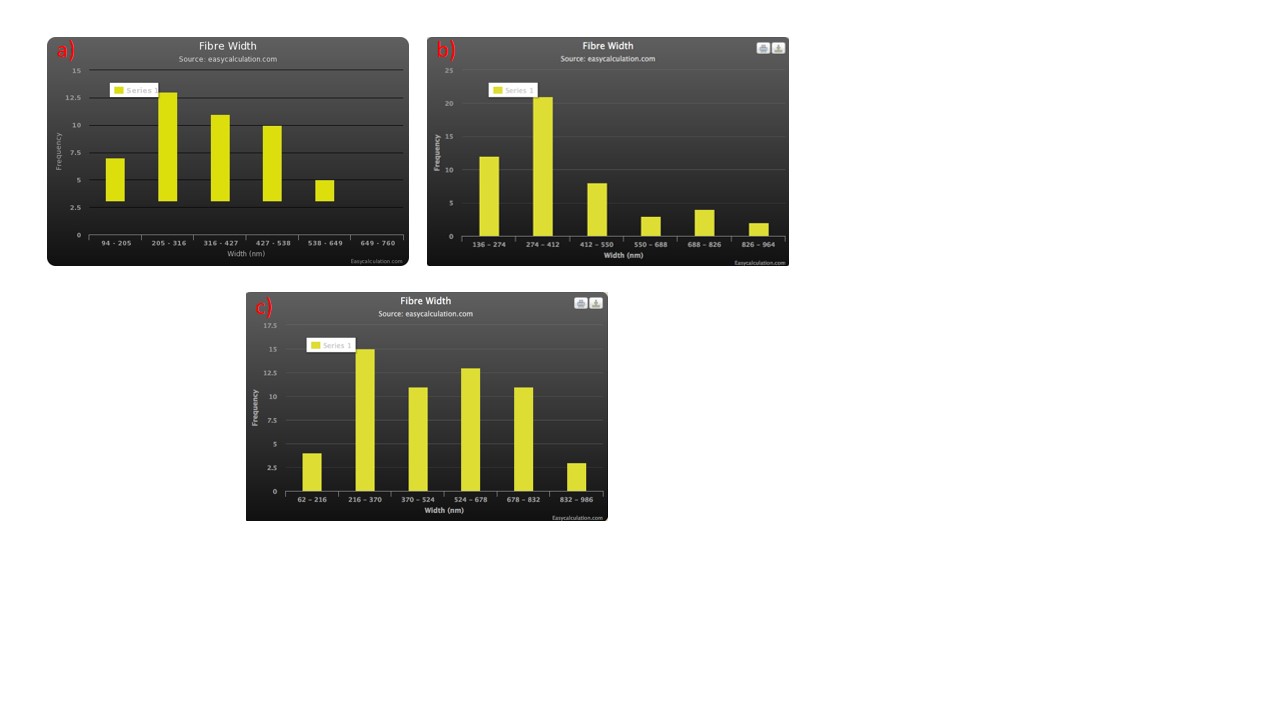


Figure S1 Histogram depicting the variation in fibre width a) PCL-Gelatin, b) PCL-Gelatin-5-Aza1 and c) PCL-Gelatin-5Aza2
